# Supplementary material for: Confirmation of the Applicability of Skeletochronology and Estimating the Age Structure of Kaloula borealis (Microhylidae: Anura) at Lake Sihwa, South Korea
Source: MDPI journal article supplement (doi:10.3390/biology11060898), 2022-06-10
Supplement: s1 [file s1]

**Table S2:** Detailed method of Skeletochronology.

**S2.1 Pre-processing:**

**Remove fixing agent – softening – remove softening solution – dehydration – clearing  
– penetration**

| Number | Material                | Time | Reason                                                              | Contents and Precautions                                                                                                                                                                                                                              |
|--------|-------------------------|------|---------------------------------------------------------------------|-------------------------------------------------------------------------------------------------------------------------------------------------------------------------------------------------------------------------------------------------------|
| 1      | Running water           | 24h  | Remove fixing agent                                                 | <p>* The best method is to purchase and use a plastic container for tissue staining</p> <p>* Separately wrapped with gauze<br/>→ About 2 layers is suitable</p> <p>* Mark the number with a pencil (graphite)<br/>→ Insoluble in organic solvents</p> |
| 2      | 5% nitric acid solution | 2h   | Bone softening:<br>The process of softening bones within the tissue |                                                                                                                                                                                                                                                       |
| 3      | Running water           | 24h  | Remove softening solution                                           |                                                                                                                                                                                                                                                       |
| 4      | 70% Ethanol             | 30m  | Dehydration                                                         | * Beware of changes in ethanol concentration: it needs to be replaced regularly                                                                                                                                                                       |
| 5      | 80% Ethanol             | 30m  |                                                                     |                                                                                                                                                                                                                                                       |
| 6      | 90% Ethanol             | 30m  |                                                                     |                                                                                                                                                                                                                                                       |
| 7      | 100% Ethanol            | 30m  |                                                                     |                                                                                                                                                                                                                                                       |
| 8      | 100% Ethanol            | 30m  |                                                                     |                                                                                                                                                                                                                                                       |
| 9      | Histoclear              | 30m  | Clearing:                                                           | * Use of undiluted solution                                                                                                                                                                                                                           |
| 10     | Histoclear              | 30m  |                                                                     |                                                                                                                                                                                                                                                       |

|    |            |       |                                                                                       |  |
|----|------------|-------|---------------------------------------------------------------------------------------|--|
| 11 | Histoclear | 30m   | The process of substituting a substance that can be fused with a penetrant (paraffin) |  |
|    |            | 2d 6h |                                                                                       |  |

## S2.2 Embedding process:

The process of preparing the tissue that has been penetrated with a shape suitable for thin cutting using a microtome.

| Number | Material                                                                                    | Time | Reason                                                               | Contents and Precautions                                                                                                                       |
|--------|---------------------------------------------------------------------------------------------|------|----------------------------------------------------------------------|------------------------------------------------------------------------------------------------------------------------------------------------|
| 1      | Liquid paraffin in a drying oven set at 60°C to 70°C                                        | 24h  | Impregnation:<br><br>Process of paraffin penetration into toe tissue | * Temperature control of the drying oven is important                                                                                          |
| 2      | Preparation of a plastic mold (base mold for histology) containing liquid paraffin          |      | Fixing toe tissue                                                    | * Appropriate depth of base mold is 5~6mm<br><br>* Proceed on the pad above the dryer                                                          |
| 3      | Before the paraffin hardens, the toe tissue is erected vertically using a dissecting needle |      | Easy microtomy                                                       | * If you make a mistake, put it back in the dryer to melt the paraffin and try again<br><br>* Be careful not to get air around the toe tissue. |
| 4      | When the paraffin hardens, it is separated from the plastic mold                            |      |                                                                      |                                                                                                                                                |
| 5      | Remove excess paraffin in trapezoidal shape, leaving it only around the toe tissue          |      |                                                                      | * The trapezoid should be continuously attached to the blade when cutting                                                                      |

### S2.3 Microtomy process:

The process of thinly cutting the paraffin pieces after the embedding process has been completed.

| Number | Material                                                                   | Time | Reason                                                                                     | Contents and Precautions                                                                                                                                                                                                                                                                                                                                                                                                                           |
|--------|----------------------------------------------------------------------------|------|--------------------------------------------------------------------------------------------|----------------------------------------------------------------------------------------------------------------------------------------------------------------------------------------------------------------------------------------------------------------------------------------------------------------------------------------------------------------------------------------------------------------------------------------------------|
| 1      | Cut to a thickness of 10-15 $\mu\text{m}$ using a microtome                |      | For observation by staining                                                                | * The thinner the better                                                                                                                                                                                                                                                                                                                                                                                                                           |
| 2      | The cut toe cross-section is placed on a slide glass using distilled water |      |                                                                                            | * Use of distilled water<br>* Prepare slide glass                                                                                                                                                                                                                                                                                                                                                                                                  |
| 3      | Put it in a slide warmer set at 35~40°C                                    | 24h  | To make sure that the paraffin of the toe cross-section is firmly fixed to the slide glass | * Caution<br><br>1. If separated:<br>(If paraffin and toe cross-section are separated)<br><br>There is a problem with the thickness and angle of the blade when cutting<br><br>2. If torn:<br><br>There is a problem with the position (bluntness) of the blade<br><br>3. If there is a hole:<br>(Tissue and bone are separated)<br><br>There is a problem in the dehydration (pre-treatment) process<br><br>-> If the above problems occur, start |

|  |  |  |  |                                     |
|--|--|--|--|-------------------------------------|
|  |  |  |  | over from the<br>embedding process. |
|--|--|--|--|-------------------------------------|

## S2.4 Staining process:

H&E staining method (hematoxylin and eosin staining method) to confirm the age line.

Paraffin removal process → hydrous process → staining process

| Number | Material                     | Time         | Reason                   | Contents and Precautions               |
|--------|------------------------------|--------------|--------------------------|----------------------------------------|
| 1      | Histoclear                   | 3m           | Paraffin removal process | * Use of undiluted solution            |
| 2      | Histoclear                   | 3m           |                          | * Use of undiluted solution            |
| 3      | Histoclear                   | 3m           |                          | * Use of undiluted solution            |
| 4      | 100% Ethanol                 | 2m           | Hydrous process          |                                        |
| 5      | 100% Ethanol                 | 2m           |                          |                                        |
| 6      | 95% Ethanol                  | 1m           |                          |                                        |
| 7      | 95% Ethanol                  | 1m           |                          |                                        |
| 8      | 70% Ethanol                  | 2m           |                          |                                        |
| 9      | 70% Ethanol                  | 2m           |                          |                                        |
| 10     | Distilled water              | 5m           |                          |                                        |
| 11     | 100% Ethanol                 | 2m           | Staining process         |                                        |
| 12     | 95% Ethanol                  | 2m           |                          |                                        |
| 13     | 95% Ethanol                  | 2m           |                          |                                        |
| 14     | Scott's tap water substitute | Rinse        |                          |                                        |
| 15     | Harris's Hematoxylin         | 30m          |                          | * Replace when the stain becomes black |
| 16     | Scott's tap water            | 10th dipping |                          |                                        |
| 17     | Scott's tap water            | 10th dipping |                          |                                        |
| 18     | Differentiator               | 15th dipping |                          |                                        |
| 19     | Distilled water              | Rinse        |                          | * Wash                                 |
| 20     | 0.05% Lithium Carbonate      | 30sec        |                          |                                        |
| 21     | Scott's tap water            | 10th dipping |                          | * Dipping                              |
| 22     | Scott's tap water            | 10th dipping |                          |                                        |

|    |              |              |          |                                        |
|----|--------------|--------------|----------|----------------------------------------|
| 23 | Eosin        | 15th dipping |          | * Replace when the stain becomes black |
| 24 | 95% Ethanol  | 1m           | Clearing |                                        |
| 25 | 95% Ethanol  | 1m           |          |                                        |
| 26 | 100% Ethanol | 1m           |          |                                        |
| 27 | 100% Ethanol | 1m           |          |                                        |
| 28 | 100% Ethanol | 1m           |          |                                        |
| 29 | Histoclear   | 3m           |          | * Use of undiluted solution            |
| 30 | Histoclear   | 3m           |          | * Use of undiluted solution            |
| 31 | Histoclear   | 3m           |          | * Use of undiluted solution            |
|    |              | Almost 1h30m |          |                                        |

## S2.5 Mounting and Observation:

Completion of permanent preparation using mounting agent (permount) and age estimate using optical microscope.

| Number | Material                                                                                     | Contents and Precautions                                                                  |
|--------|----------------------------------------------------------------------------------------------|-------------------------------------------------------------------------------------------|
| 1      | Completion of permanent preparation using a fixing mounting agent (permount) and cover glass | * Put the mounting agent drop by drop between the samples, and then cover the cover glass |
| 2      | Observation with an optical microscope (×400 magnification)                                  | * LAG (purple) / tissue (red)<br>* Check whether Eosin is altered or not                  |
| 3      | Take pictures using an image system and a digital camera                                     |                                                                                           |

## S2.6 Method of making staining solution

| Serial Number | Staining solution                                                                                               | Procedure                                                                                                                                                           |
|---------------|-----------------------------------------------------------------------------------------------------------------|---------------------------------------------------------------------------------------------------------------------------------------------------------------------|
| 1             | <b>Harris's Hematoxylin:</b><br><br>Liquid products can be purchased and used if they are available the offline | ① Completely dissolve 2.5 g of Hematoxylin crystal (C <sub>16</sub> H <sub>14</sub> O <sub>6</sub> ) in 100% ethanol (C <sub>2</sub> H <sub>5</sub> OH).            |
|               |                                                                                                                 | ② Dissolve Ammonium potassium sulfate [Alk(SO <sub>4</sub> ) <sub>2</sub> ·12H <sub>2</sub> O] in 500ml of distilled water and heat.                                |
|               |                                                                                                                 | ③ While heating (before boiling), slowly pour (1) into (2) and mix the two solutions well.                                                                          |
|               |                                                                                                                 | ④ Boil the solution while adding 1.25 g of Mercury (II) oxide (MgO) to the mixed solution.                                                                          |
|               |                                                                                                                 | ⑤ Boil the solution to which all reagents have been added until it turns black purple, and immediately after boiling, put it in a bowl of cold water until it cools |

|   |                               |                                                                                                                                           |
|---|-------------------------------|-------------------------------------------------------------------------------------------------------------------------------------------|
|   |                               | down.                                                                                                                                     |
|   |                               | ⑥ When the solution is cold, add 4 ml of acetic acid ( $\text{CH}_3\text{COOH}$ ) per 100 ml to increase the color accuracy.              |
| 2 | Eosin                         | Add 4g of Eosin Y ( $\text{C}_{20}\text{H}_6\text{Br}_4\text{Na}_2\text{O}_5$ ) to 400ml of distilled water and mix well.                 |
| 3 | Differentiator                | Add 4 ml of hydrochloric acid (HCl) to 400 ml of 70% ethanol ( $\text{C}_2\text{H}_5\text{OH}$ ).                                         |
| 4 | Scotti's tap water substitute | Add 40g of sodium bicarbonate ( $\text{NaHCO}_3$ ) and 7g of magnesium sulfate ( $\text{MgSO}_4$ ) to 1L of distilled water and mix well. |
