# Supplementary material for: Confirmation of the Applicability of Skeletochronology and Estimating the Age Structure of Kaloula borealis (Microhylidae: Anura) at Lake Sihwa, South Korea
Source: Biology (Basel). 2022 Jun 10;11(6):898. doi: 10.3390/biology11060898 (PMC9220234; doi:10.3390/biology11060898)
Supplement: Supplementary file 1 [file biology-11-00898-s001.zip › biology-1757600-sup/Table S1_Determination and comparison of threshold diameters of ML and LAG1.xlsx]

## Sheet: S1_1 Threshold diameter of ML
Individual Number	Intercept 1				Intercept 2				Intercept 3				Intercept 4				A	A/4
	L	S	L*S=a	Root a	L	S	L*S=a	Root a	L	S	L*S=a	Root a	L	S	L*S=a	Root a
동면후1	125	98	12250	110.68	118	92	10856	104.192	137	104	14248	119.365	136	104	14144	118.929	453.165	113.291		A = the sum of the root a values ​​of the four intercepts.
동면후2	146	109	15914	126.151	127	104	13208	114.926	128	109	13952	118.119	132	123	16236	127.421	486.616	121.654		A/4 = average diameter of one object/4 -> average diameter of one object
동면후3	123	123	15129	123	119	118	14042	118.499	118	119	14042	118.499	112	117	13104	114.473	474.471	118.618
동면후4	98	111	10878	104.298	108	121	13068	114.315	110	130	14300	119.583	108	103	11124	105.47	443.666	110.916
동면후5	121	124	15004	122.491	120	120	14400	120	121	126	15246	123.475	128	114	14592	120.797	486.763	121.691
동면후6	103	104	10712	103.499	105	114	11970	109.407	99	113	11187	105.769	97	110	10670	103.296	421.971	105.493
동면후7	126	105	13230	115.022	124	107	13268	115.187	139	119	16541	128.612	129	110	14190	119.122	477.942	119.486
동면후8	120	133	15960	126.333	119	110	13090	114.412	116	114	13224	114.996	109	119	12971	113.89	469.63	117.408
동면후9	133	125	16625	128.938	133	107	14231	119.294	127	126	16002	126.499	126	112	14112	118.794	493.525	123.381
동면후10	124	101	12524	111.911	122	103	12566	112.098	119	102	12138	110.173	118	107	12626	112.365	446.547	111.637
변태1	117	85	9945	99.7246	111	90	9990	99.95	115	85	9775	98.8686	113	85	9605	98.0051	396.548	99.1371
변태2	116	69	8004	89.4651	119	69	8211	90.6146	118	86	10148	100.737	123	92	11316	106.377	387.194	96.7984
변태3	115	78	8970	94.7101	115	74	8510	92.2497	115	110	12650	112.472	110	100	11000	104.881	404.313	101.078
변태4	113	84	9492	97.4269	111	80	8880	94.2338	123	88	10824	104.038	121	92	11132	105.508	401.207	100.302
변태5	124	84	10416	102.059	125	79	9875	99.373	128	82	10496	102.45	129	83	10707	103.475	407.356	101.839
변태6	134	106	14204	119.181	124	100	12400	111.355	125	102	12750	112.916	123	104	12792	113.102	456.553	114.138
변태7	110	93	10230	101.143	126	98	12348	111.122	120	98	11760	108.444	121	107	12947	113.785	434.493	108.623
변태8	114	78	8892	94.2974	101	92	9292	96.395	124	99	12276	110.797	124	99	12276	110.797	412.287	103.072
변태9	118	84	9912	99.559	118	84	9912	99.559	119	87	10353	101.75	117	82	9594	97.949	398.817	99.7042
변태10	121	97	11737	108.337	121	88	10648	103.189	120	91	10920	104.499	119	104	12376	111.247	427.273	106.818		B = Mean ML Diameter Values
																		109.754	B = Add up all 20 values ​​above and divide 20 -> ML standard value
																		B			2SD
																			Standard Deviation	8.64445	17.2889
																			Threshold (B+2SD)	127.043
																							`

## Sheet: S1_2 Threshold diameter of LAG1
Individual Number	Intercept 1				Intercept 2				Intercept 3				Intercept 4				A	A/4
	L	S	L*S=a	Root a	L	S	L*S=a	Root a	L	S	L*S=a	Root a	L	S	L*S=a	Root a
활동후1	174	135	23490	153.264	170	128	21760	147.513	207	158	32706	180.848	202	157	31714	178.084	659.709	164.927
활동후2	183	148	27084	164.572	160	148	23680	153.883	171	156	26676	163.328	170	173	29410	171.493	653.277	163.319		A = the sum of the root a values ​​of the four intercepts.
활동후3	156	162	25272	158.972	151	154	23254	152.493	165	157	25905	160.95	153	159	24327	155.971	628.386	157.096		A/4 = average diameter of one object/4 -> average diameter of one object
활동후4	153	146	22338	149.459	163	155	25265	158.95	172	155	26660	163.279	143	153	21879	147.916	619.603	154.901
활동후5	182	161	29302	171.178	177	161	28497	168.811	182	160	29120	170.646	178	158	28124	167.702	678.337	169.584
활동후6	155	139	21545	146.782	160	140	22400	149.666	153	138	21114	145.307	154	134	20636	143.652	585.407	146.352
활동후7	178	158	28124	167.702	174	162	28188	167.893	194	171	33174	182.137	162	174	28188	167.893	685.625	171.406
활동후8	176	179	31504	177.494	175	160	28000	167.332	171	172	29412	171.499	208	160	33280	182.428	698.753	174.688
활동후9	167	174	29058	170.464	171	153	26163	161.75	157	164	25748	160.462	205	155	31775	178.255	670.931	167.733
활동후10	150	167	25050	158.272	169	148	25012	158.152	164	153	25092	158.405	166	156	25896	160.922	635.751	158.938		B = Average LAG1 Diameter Value
																		162.894	B = Add up all 10 values ​​above and divide 10. -> LAG1 standard value
																		B			2SD
																			Standard Deviation	8.63359	17.2672
																			Threshold = (B+2SD)	180.162

## Sheet: S1_3 Comparison of LAG1_2013
Individual Number	Intercept 1				Intercept 2				Intercept 3				Intercept 4				A	A/4	IVL
	L	S	L*S=a	Root a	L	S	L*S=a	Root a	L	S	L*S=a	Root a	L	S	L*S=a	Root a
2013_22	107	113	12091	109.959	116	116	13456	116	119	115	13685	116.983	119	115	13685	116.983	459.925	114.981	ML
2013_48	123	115	14145	118.933	123	114	14022	118.415	126	114	14364	119.85	130	116	15080	122.801	479.998	119.999	ML
2013_11	148	111	16428	128.172	148	112	16576	128.748	127	110	13970	118.195	119	110	13090	114.412	489.526	122.381	ML
2013_63	140	112	15680	125.22	132	120	15840	125.857	136	119	16184	127.216	135	125	16875	129.904	508.197	127.049	ML
2013_61	144	108	15552	124.708	147	108	15876	126	146	111	16206	127.303	151	118	17818	133.484	511.495	127.874	LAG1
2013_37	155	115	17825	133.51	132	117	15444	124.274	130	121	15730	125.419	133	128	17024	130.476	513.68	128.42	LAG1
2013_8	128	110	14080	118.659	132	110	14520	120.499	157	135	21195	145.585	140	126	17640	132.816	517.559	129.39	LAG1
2013_6	120	136	16320	127.75	127	132	16764	129.476	127	139	17653	132.865	123	134	16482	128.382	518.472	129.618	LAG1
2013_29	150	125	18750	136.931	143	122	17446	132.083	141	130	18330	135.388	125	120	15000	122.474	526.877	131.719	LAG1
2013_14	155	115	17825	133.51	164	114	18696	136.733	154	111	17094	130.744	144	114	16416	128.125	529.113	132.278	LAG1
2013_28	146	124	18104	134.551	146	124	18104	134.551	146	124	18104	134.551	146	124	18104	134.551	538.204	134.551	LAG1
2013_58	146	125	18250	135.093	144	122	17568	132.544	145	129	18705	136.766	142	130	18460	135.868	540.271	135.068	LAG1
2013_15	130	145	18850	137.295	130	144	18720	136.821	127	142	18034	134.291	126	142	17892	133.761	542.168	135.542	LAG1
2013_7	130	148	19240	138.708	127	147	18669	136.635	131	136	17816	133.477	133	134	17822	133.499	542.319	135.58	LAG1
2013_43	168	121	20328	142.576	151	112	16912	130.046	154	122	18788	137.069	152	123	18696	136.733	546.425	136.606	LAG1
2013_10	161	123	19803	140.723	156	130	20280	142.408	140	127	17780	133.342	150	123	18450	135.831	552.303	138.076	LAG1
2013_9	156	130	20280	142.408	161	125	20125	141.863	157	126	19782	140.648	155	126	19530	139.75	564.669	141.167	LAG1
2013_56	168	128	21504	146.642	158	122	19276	138.838	138	132	18216	134.967	179	121	21659	147.17	567.617	141.904	LAG1
2013_45	160	132	21120	145.327	152	130	19760	140.57	158	134	21172	145.506	155	122	18910	137.514	568.917	142.229	LAG1
2013_60	152	135	20520	143.248	157	134	21038	145.045	150	130	19500	139.642	152	134	20368	142.717	570.652	142.663	LAG1
2013_42	158	120	18960	137.695	154	131	20174	142.035	154	131	20174	142.035	167	133	22211	149.034	570.799	142.7	LAG1
2013_33	163	128	20864	144.444	158	126	19908	141.096	158	127	20066	141.655	157	134	21038	145.045	572.239	143.06	LAG1
2013_34	154	135	20790	144.187	156	136	21216	145.657	148	136	20128	141.873	152	142	21584	146.915	578.633	144.658	LAG1
2013_53	151	136	20536	143.304	136	155	21080	145.19	155	131	20305	142.496	154	142	21868	147.878	578.867	144.717	LAG1
2013_27	167	117	19539	139.782	148	121	17908	133.821	175	133	23275	152.561	175	139	24325	155.965	582.129	145.532	LAG1
2013_51	164	131	21484	146.574	163	144	23472	153.206	153	125	19125	138.293	159	133	21147	145.42	583.493	145.873	LAG1
2013_38	135	161	21735	147.428	161	132	21252	145.781	154	143	22022	148.398	165	127	20955	144.758	586.365	146.591	LAG1
2013_54	166	118	19588	139.957	168	138	23184	152.263	167	121	20207	142.151	169	138	23322	152.715	587.087	146.772	LAG1
2013_59	157	129	20253	142.313	157	133	20881	144.503	156	132	20592	143.499	163	151	24613	156.885	587.2	146.8	LAG1
2013_36	161	131	21091	145.227	165	131	21615	147.02	160	141	22560	150.2	168	128	21504	146.642	589.09	147.273	LAG1
2013_47	163	132	21516	146.683	168	131	22008	148.351	163	135	22005	148.341	155	137	21235	145.722	589.097	147.274	LAG1
2013_24	145	153	22185	148.946	147	154	22638	150.459	144	151	21744	147.458	140	146	20440	142.969	589.833	147.458	LAG1
2013_55	161	136	21896	147.973	158	137	21646	147.126	155	143	22165	148.879	160	139	22240	149.131	593.109	148.277	LAG1
2013_19	162	126	20412	142.871	147	145	21315	145.997	165	149	24585	156.796	164	133	21812	147.689	593.352	148.338	LAG1
2013_62	161	131	21091	145.227	162	137	22194	148.977	160	137	21920	148.054	169	138	23322	152.715	594.973	148.743	LAG1
2013_16	151	141	21291	145.914	147	131	19257	138.77	151	138	20838	144.354	171	164	28044	167.463	596.501	149.125	LAG1
2013_2	178	127	22606	150.353	173	126	21798	147.641	165	139	22935	151.443	179	124	22196	148.983	598.421	149.605	LAG1
2013_3	165	140	23100	151.987	161	138	22218	149.057	163	137	22331	149.436	157	140	21980	148.257	598.736	149.684	LAG1
2013_50	172	157	27004	164.329	157	132	20724	143.958	170	137	23290	152.611	164	133	21812	147.689	608.587	152.147	LAG1
2013_41	168	131	22008	148.351	164	136	22304	149.345	186	142	26412	162.518	168	133	22344	149.479	609.693	152.423	LAG1
2013_35	155	135	20925	144.655	163	145	23635	153.737	161	148	23828	154.363	175	150	26250	162.019	614.773	153.693	LAG1
2013_44	177	136	24072	155.152	171	136	23256	152.499	172	146	25112	158.468	161	138	22218	149.057	615.175	153.794	LAG1
2013_1	194	148	28712	169.446	169	132	22308	149.359	165	136	22440	149.8	163	132	21516	146.683	615.288	153.822	LAG1
2013_4	188	141	26508	162.813	142	124	17608	132.695	176	152	26752	163.56	193	139	26827	163.789	622.858	155.714	LAG1
2013_49	173	150	25950	161.09	178	148	26344	162.308	163	139	22657	150.522	161	139	22379	149.596	623.517	155.879	LAG1
2013_20	160	171	27360	165.409	147	155	22785	150.947	155	161	24955	157.972	153	146	22338	149.459	623.786	155.947	LAG1
2013_18	155	154	23870	154.499	153	150	22950	151.493	146	157	22922	151.4	196	149	29204	170.892	628.284	157.071	LAG1
2013_46	166	143	23738	154.071	171	149	25479	159.621	172	146	25112	158.468	160	157	25120	158.493	630.653	157.663	LAG1
2013_17	159	155	24645	156.987	164	145	23780	154.208	166	156	25896	160.922	166	155	25730	160.406	632.523	158.131	LAG1
2013_13	163	164	26732	163.499	157	172	27004	164.329	147	162	23814	154.318	148	157	23236	152.434	634.58	158.645	LAG1
2013_5	135	146	19710	140.392	173	158	27334	165.33	182	152	27664	166.325	178	156	27768	166.637	638.685	159.671	LAG1
2013_40	173	149	25777	160.552	177	143	25311	159.094	173	152	26296	162.16	174	150	26100	161.555	643.362	160.84	LAG1
2013_32	178	152	27056	164.487	173	148	25604	160.012	177	147	26019	161.304	174	151	26274	162.093	647.896	161.974	LAG1
2013_39	168	145	24360	156.077	170	150	25500	159.687	168	149	25032	158.215	187	162	30294	174.052	648.031	162.008	LAG1
2013_57	188	155	29140	170.704	172	149	25628	160.087	167	153	25551	159.847	169	150	25350	159.217	649.856	162.464	LAG1
2013_26	189	158	29862	172.806	193	156	30108	173.517	184	154	28336	168.333	142	140	19880	140.996	655.652	163.913	LAG1
2013_23	174	161	28014	167.374	179	149	26671	163.313	168	170	28560	168.997	162	152	24624	156.92	656.604	164.151	LAG1
2013_12	196	146	28616	169.163	195	151	29445	171.595	201	153	30753	175.365	199	147	29253	171.035	687.159	171.79	LAG1
2013_25	192	164	31488	177.449	185	161	29785	172.583	181	177	32037	178.989	180	163	29340	171.289	700.31	175.077	LAG1
2013_21	180	169	30420	174.413	189	182	34398	185.467	169	168	28392	168.499	175	169	29575	171.974	700.353	175.088	LAG1
																			B = Sum of all 61 values divide 61
																			A = the sum of the root a values ​​of the four intercepts.
																			A/4 = average diameter of one object /4 -> average diameter of one object

## Sheet: S1_4 Comparison of LAG1_2014
Individual Number	Intercept 1				Intercept 2				Intercept 3				Intercept 4				A	A/4	IVL
	L	S	L*S=a	Root a	L	S	L*S=a	Root a	L	S	L*S=a	Root a	L	S	L*S=a	Root a
2014_38	135	116	15660	125.14	141	112	15792	125.666	129	112	14448	120.2	134	113	15142	123.053	494.059	123.515	ML
2014_4	129	124	15996	126.475	129	117	15093	122.854	130	117	15210	123.329	130	124	16120	126.965	499.622	124.906	ML
2014_62	140	123	17220	131.225	138	117	16146	127.067	135	116	15660	125.14	133	113	15029	122.593	506.025	126.506	ML
2014_29	131	137	17947	133.966	135	123	16605	128.86	138	125	17250	131.339	138	122	16836	129.754	523.92	130.98	LAG1
2014_27	149	124	18476	135.926	138	127	17526	132.386	137	127	17399	131.905	140	122	17080	130.69	530.908	132.727	LAG1
2014_66	152	112	17024	130.476	155	118	18290	135.241	150	117	17550	132.476	149	121	18029	134.272	532.465	133.116	LAG1
2014_57	148	114	16872	129.892	148	111	16428	128.172	143	128	18304	135.292	151	131	19781	140.645	534.001	133.5	LAG1
2014_31	141	140	19740	140.499	138	136	18768	136.996	130	132	17160	130.996	132	131	17292	131.499	539.991	134.998	LAG1
2014_21	162	117	18954	137.674	160	117	18720	136.821	155	117	18135	134.666	150	117	17550	132.476	541.637	135.409	LAG1
2014_70	134	135	18090	134.499	138	133	18354	135.477	133	137	18221	134.985	138	137	18906	137.499	542.46	135.615	LAG1
2014_19	168	118	19824	140.798	157	119	18683	136.686	155	118	18290	135.241	162	115	18630	136.492	549.216	137.304	LAG1
2014_65	150	125	18750	136.931	146	126	18396	135.632	146	127	18542	136.169	148	136	20128	141.873	550.605	137.651	LAG1
2014_46	150	137	20550	143.353	145	134	19430	139.392	140	134	18760	136.967	137	127	17399	131.905	551.617	137.904	LAG1
2014_71	134	140	18760	136.967	141	135	19035	137.967	142	136	19312	138.968	139	137	19043	137.996	551.899	137.975	LAG1
2014_45	153	131	20043	141.573	150	130	19500	139.642	147	127	18669	136.635	142	129	18318	135.344	553.194	138.299	LAG1
2014_18	157	128	20096	141.76	150	128	19200	138.564	150	124	18600	136.382	150	128	19200	138.564	555.27	138.818	LAG1
2014_75	155	126	19530	139.75	153	123	18819	137.182	157	124	19468	139.528	153	126	19278	138.845	555.305	138.826	LAG1
2014_33	154	120	18480	135.941	156	136	21216	145.657	141	128	18048	134.343	144	135	19440	139.427	555.369	138.842	LAG1
2014_22	145	128	18560	136.235	151	131	19781	140.645	151	132	19932	141.181	155	129	19995	141.404	559.464	139.866	LAG1
2014_8	141	136	19176	138.477	141	135	19035	137.967	142	141	20022	141.499	144	140	20160	141.986	559.93	139.982	LAG1
2014_13	154	121	18634	136.506	156	123	19188	138.521	152	127	19304	138.939	167	133	22211	149.034	563	140.75	LAG1
2014_39	157	136	21352	146.123	159	134	21306	145.966	150	133	19950	141.244	139	125	17375	131.814	565.148	141.287	LAG1
2014_6	156	130	20280	142.408	150	134	20100	141.774	152	126	19152	138.391	163	129	21027	145.007	567.58	141.895	LAG1
2014_68	148	126	18648	136.558	145	135	19575	139.911	154	136	20944	144.72	157	138	21666	147.194	568.383	142.096	LAG1
2014_54	141	139	19599	139.996	141	144	20304	142.492	141	145	20445	142.986	141	148	20868	144.458	569.932	142.483	LAG1
2014_69	151	134	20234	142.246	151	132	19932	141.181	152	140	21280	145.877	150	142	21300	145.945	575.249	143.812	LAG1
2014_11	159	137	21783	147.591	159	135	21465	146.509	157	136	21352	146.123	148	128	18944	137.637	577.86	144.465	LAG1
2014_53	159	132	20988	144.872	157	133	20881	144.503	157	131	20567	143.412	152	139	21128	145.355	578.142	144.535	LAG1
2014_48	153	136	20808	144.25	149	135	20115	141.827	148	148	21904	148	157	138	21666	147.194	581.271	145.318	LAG1
2014_36	153	135	20655	143.718	148	131	19388	139.241	144	132	19008	137.87	175	151	26425	162.558	583.386	145.847	LAG1
2014_52	148	138	20424	142.913	151	147	22197	148.987	155	141	21855	147.834	153	135	20655	143.718	583.452	145.863	LAG1
2014_32	160	139	22240	149.131	162	139	22518	150.06	150	138	20700	143.875	151	137	20687	143.83	586.896	146.724	LAG1
2014_15	159	143	22737	150.788	152	139	21128	145.355	153	139	21267	145.832	153	139	21267	145.832	587.807	146.952	LAG1
2014_63	162	135	21870	147.885	164	131	21484	146.574	165	135	22275	149.248	163	132	21516	146.683	590.391	147.598	LAG1
2014_40	153	139	21267	145.832	148	143	21164	145.479	152	147	22344	149.479	153	150	22950	151.493	592.282	148.071	LAG1
2014_43	142	143	20306	142.499	151	146	22046	148.479	154	143	22022	148.398	154	152	23408	152.997	592.373	148.093	LAG1
2014_7	166	144	23904	154.609	160	136	21760	147.513	156	134	20904	144.582	157	137	21509	146.659	593.364	148.341	LAG1
2014_41	165	137	22605	150.35	162	137	22194	148.977	158	136	21488	146.588	155	141	21855	147.834	593.748	148.437	LAG1
2014_49	146	147	21462	146.499	158	143	22594	150.313	157	144	22608	150.36	153	143	21879	147.916	595.087	148.772	LAG1
2014_64	164	136	22304	149.345	161	138	22218	149.057	158	144	22752	150.838	164	136	22304	149.345	598.585	149.646	LAG1
2014_23	155	137	21235	145.722	158	140	22120	148.728	156	149	23244	152.46	163	146	23798	154.266	601.176	150.294	LAG1
2014_67	177	132	23364	152.853	173	133	23009	151.687	159	144	22896	151.314	161	132	21252	145.781	601.635	150.409	LAG1
2014_34	156	150	23400	152.971	153	148	22644	150.479	155	150	23250	152.48	149	145	21605	146.986	602.916	150.729	LAG1
2014_74	161	145	23345	152.791	157	143	22451	149.837	155	148	22940	151.46	154	145	22330	149.432	603.519	150.88	LAG1
2014_60	154	148	22792	150.97	158	142	22436	149.787	156	147	22932	151.433	157	146	22922	151.4	603.59	150.897	LAG1
2014_2	173	136	23528	153.388	169	136	22984	151.605	153	144	22032	148.432	153	148	22644	150.479	603.904	150.976	LAG1
2014_50	167	138	23046	151.809	166	136	22576	150.253	162	142	23004	151.671	161	142	22862	151.202	604.935	151.234	LAG1
2014_61	163	134	21842	147.79	160	136	21760	147.513	168	133	22344	149.479	176	146	25696	160.3	605.082	151.27	LAG1
2014_58	152	151	22952	151.499	157	142	22294	149.312	156	144	22464	149.88	168	151	25368	159.273	609.964	152.491	LAG1
2014_73	155	142	22010	148.358	154	151	23254	152.493	156	157	24492	156.499	157	150	23550	153.46	610.81	152.702	LAG1
2014_51	151	147	22197	148.987	155	153	23715	153.997	161	154	24794	157.461	153	148	22644	150.479	610.924	152.731	LAG1
2014_20	168	139	23352	152.814	171	139	23769	154.172	168	136	22848	151.156	173	141	24393	156.183	614.324	153.581	LAG1
2014_78	154	147	22638	150.459	160	147	23520	153.362	162	146	23652	153.792	161	154	24794	157.461	615.075	153.769	LAG1
2014_28	160	148	23680	153.883	157	145	22765	150.881	164	148	24272	155.795	164	148	24272	155.795	616.353	154.088	LAG1
2014_55	185	142	26270	162.08	131	179	23449	153.131	170	134	22780	150.93	166	139	23074	151.901	618.043	154.511	LAG1
2014_37	176	140	24640	156.971	172	137	23564	153.506	171	149	25479	159.621	161	138	22218	149.057	619.155	154.789	LAG1
2014_25	162	152	24624	156.92	157	148	23236	152.434	160	158	25280	158.997	155	147	22785	150.947	619.298	154.824	LAG1
2014_56	170	139	23630	153.721	174	150	26100	161.555	168	148	24864	157.683	165	135	22275	149.248	622.207	155.552	LAG1
2014_1	175	138	24150	155.403	171	139	23769	154.172	177	151	26727	163.484	166	139	23074	151.901	624.96	156.24	LAG1
2014_30	181	167	30227	173.859	164	136	22304	149.345	168	135	22680	150.599	166	140	23240	152.447	626.25	156.562	LAG1
2014_26	164	152	24928	157.886	164	153	25092	158.405	160	151	24160	155.435	165	151	24915	157.845	629.57	157.393	LAG1
2014_72	164	149	24436	156.32	168	151	25368	159.273	169	150	25350	159.217	167	145	24215	155.612	630.422	157.606	LAG1
2014_3	173	150	25950	161.09	163	144	23472	153.206	170	153	26010	161.276	170	147	24990	158.082	633.654	158.414	LAG1
2014_14	174	151	26274	162.093	168	155	26040	161.369	163	148	24124	155.319	164	153	25092	158.405	637.185	159.296	LAG1
2014_77	169	161	27209	164.952	161	161	25921	161	162	164	26568	162.997	164	143	23452	153.14	642.089	160.522	LAG1
2014_76	167	156	26052	161.406	165	154	25410	159.405	167	159	26553	162.951	168	155	26040	161.369	645.132	161.283	LAG1
2014_12	195	137	26715	163.447	189	136	25704	160.325	190	131	24890	157.766	187	145	27115	164.666	646.204	161.551	LAG1
2014_24	182	149	27118	164.675	174	151	26274	162.093	178	150	26700	163.401	179	146	26134	161.66	651.829	162.957	LAG1
2014_5	159	146	23214	152.361	163	148	24124	155.319	189	161	30429	174.439	190	156	29640	172.163	654.282	163.571	LAG1
2014_16	191	148	28268	168.131	190	149	28310	168.256	181	143	25883	160.882	181	145	26245	162.003	659.272	164.818	LAG1
2014_17	185	149	27565	166.027	182	148	26936	164.122	180	148	26640	163.218	190	150	28500	168.819	662.186	165.547	LAG1
2014_42	214	154	32956	181.538	148	180	26640	163.218	178	139	24742	157.296	180	144	25920	160.997	663.048	165.762	LAG1
2014_35	179	156	27924	167.105	175	149	26075	161.478	172	155	26660	163.279	188	160	30080	173.436	665.297	166.324	LAG1
2014_59	191	159	30369	174.267	188	160	30080	173.436	194	160	31040	176.182	190	158	30020	173.263	697.147	174.287	LAG1
2014_44	191	175	33425	182.825	172	164	28208	167.952	175	172	30100	173.494	178	172	30616	174.974	699.245	174.811	LAG1
2014_47	188	167	31396	177.189	198	169	33462	182.926	189	173	32697	180.823	188	171	32148	179.299	720.237	180.059	LAG1
																		B	B = Sum of all 78 values divide 78
																			A = the sum of the root a values ​​of the four intercepts.
																			A/4 = average diameter of one object /4 -> average diameter of one object
